# Supplementary material
Source: publisher figshare collection journal article supplement (https://aacr.figshare.com/articles/dataset/_/22490324)
Supplement: Supplementary file 1 [file 39941957]

**Fig. S4**

**A**

SHP77 tumor volume

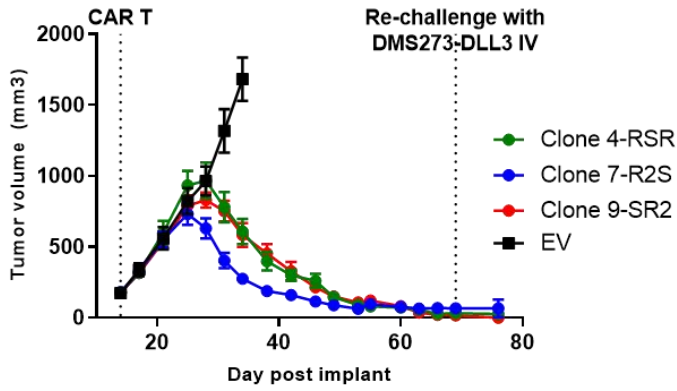

**B**

DMS273-DLL3 tumor growth upon re-challenge

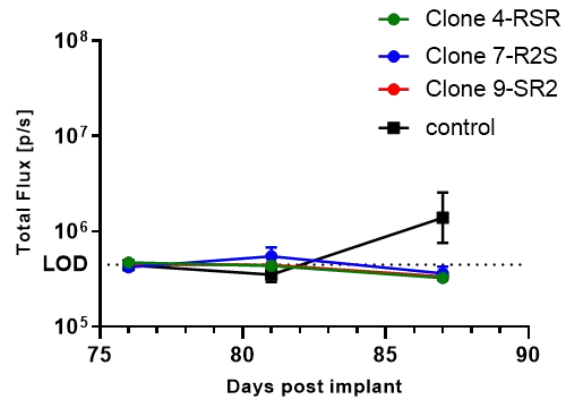

**C**

DMS273-DLL3 subcutaneous model

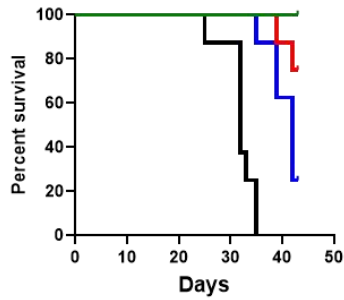

— NTD  
— Clone 7-R2S  
— Clone 9-SR2  
— Clone 4-RSR

**D**

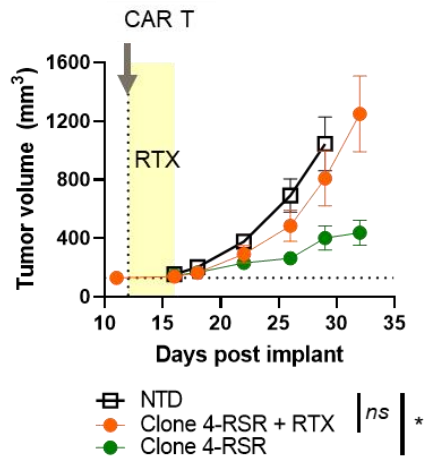

— NTD  
— Clone 4-RSR + RTX  
— Clone 4-RSR

*ns* | \*

Tumor volume on day 32

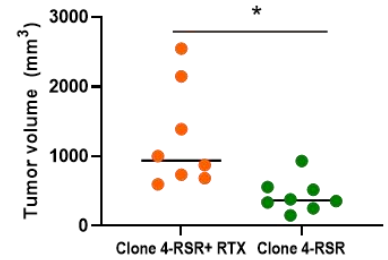

**E**

Whole body

Liver

Lungs

Kidneys

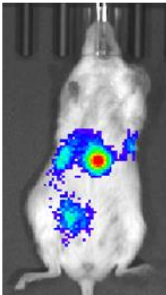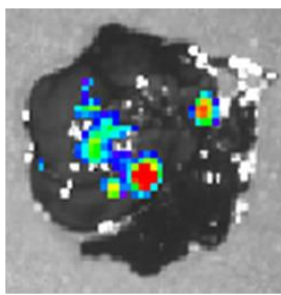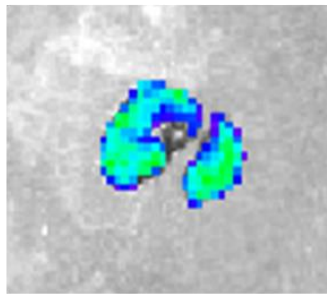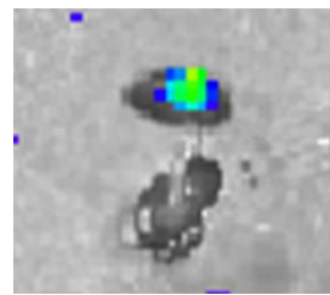

**Fig. S4 continued**

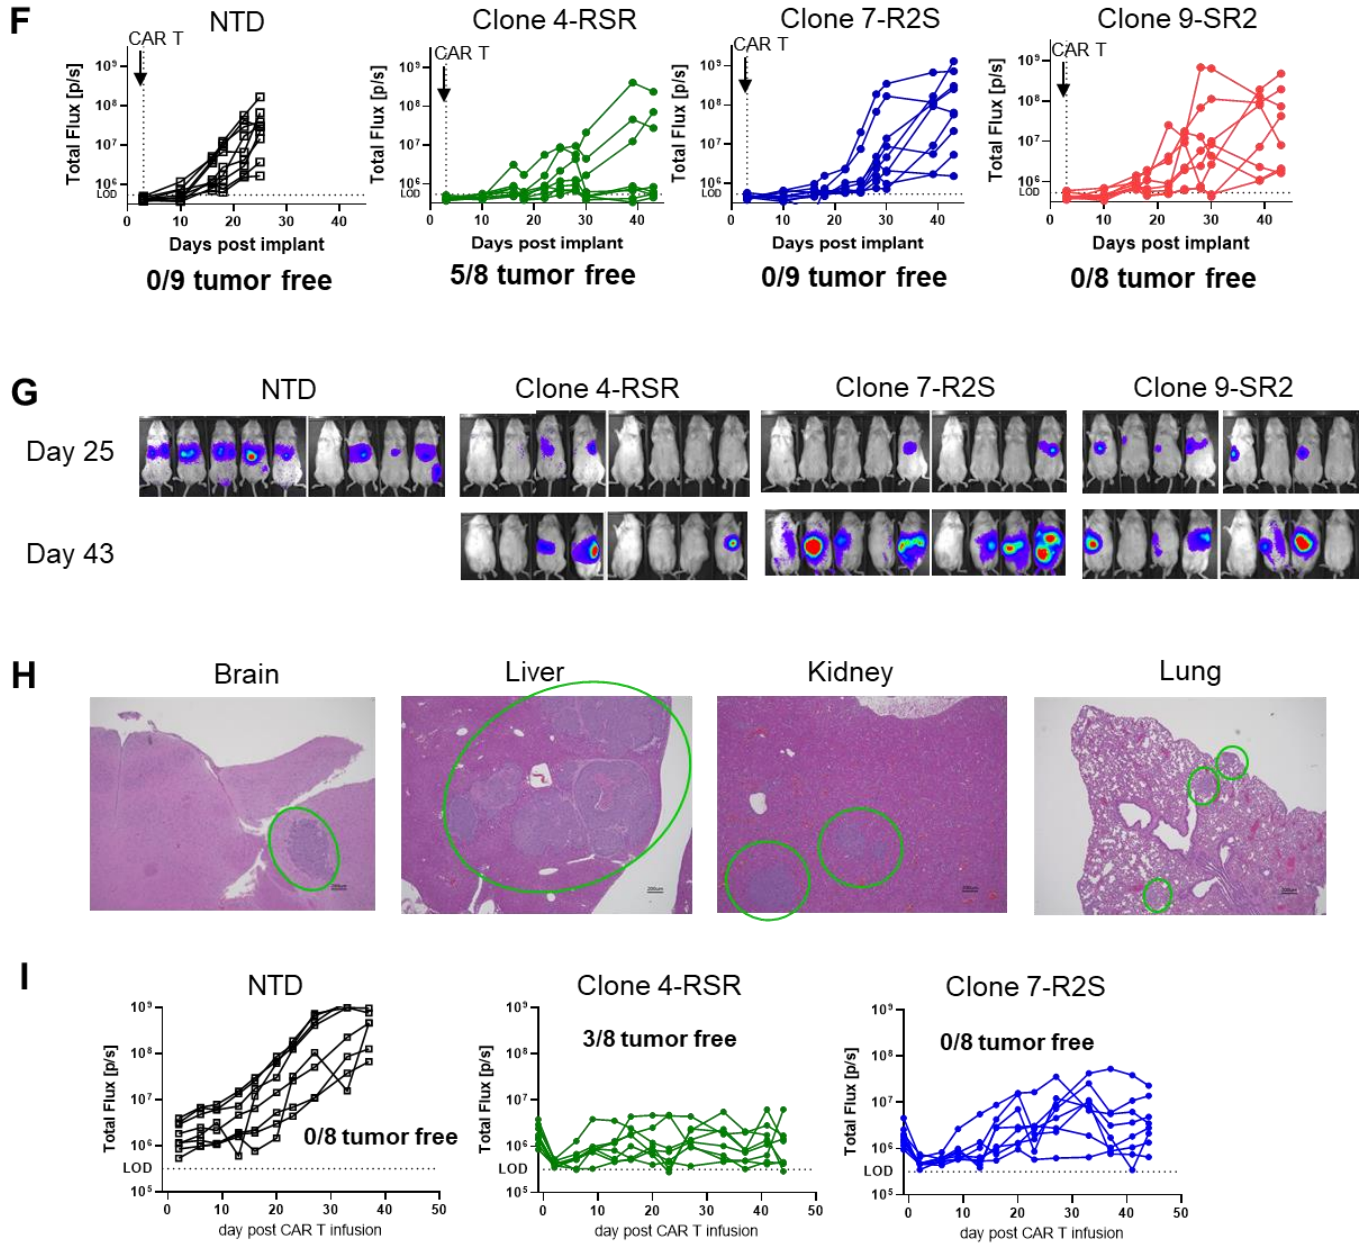

**Fig. S4. In vivo activity of DLL3 CAR T cells.** (A) The study shown in Fig. 4A was monitored for tumor growth out to 87 days. Most mice remained tumor free of SHP77 SC tumors and were re-challenge with luciferase-labeled DMS273-DLL3 tumors injected intravenously at  $1 \times 10^5$  cells/mouse on day 69. (B) The DMS273-DLL3 tumor burden in the study shown in Fig. S4A

was tracked by luminescence imaging and compared to tumor burden in naïve non-CAR treated mice. No detectable tumor was observed in DLL3 CAR-treated mice, while tumors did begin to grow out in CAR naïve control mice. (C) Survival curve of DMS273-DLL3 subcutaneous model demonstrating that animals who received clone 4-RSR had the best survival at the end of the study. (D) Rituximab treatment efficiently suppressed in vivo activity of DLL3 CAR T cells. DMS273-DLL3 cells were implanted subcutaneously and a single dose of CAR T cells ( $3 \times 10^6$  CAR+ cells per animal) were injected on day 12. Starting from the day of CAR T dosing, 10 mg/kg rituximab (RTX) was dosed for 5 consecutive days via IP injection. RM One Way ANOVA was performed on tumor volume on days 16-29 with Dunnett's multiple comparisons test,  $p < 0.05$ . Paired t-test was performed on tumor volume on day 32. \*,  $p < 0.05$ . Error bars represent SEM,  $n=8$ . (E) Representative bioluminescence image of mouse, liver, lungs, and kidneys after IV implantation of DMS273-DLL3 tumor cells. (F) Tumor burden of individual animals in DMS273-DLL3 systemic model demonstrating only the clone 4-RSR-treated group had tumor-free animals. (G) Bioluminescence images of animals in DMS273-DLL3 systemic model. (H) H&E images demonstrating tumor cells in SHP-77 systemic model were detected in brain, liver, kidney and lung. Green circles indicate tumor cells. (I) Tumor burden of individual animals in SHP-77 systemic model demonstrating only clone 4-RSR-treated group had tumor-free animals.
